# Supplementary material for: Straightjacket/α2δ3 deregulation is associated with cardiac conduction defects in myotonic dystrophy type 1
Source: eLife. 2019 Dec 12;8:e51114. doi: 10.7554/eLife.51114 (PMC6908436; doi:10.7554/eLife.51114)
Supplement: Figure 3—source data 1. — Orthology scores were obtained from DIOPT tool (DRSC Integrative Ortholog Prediction Tool) (Hu et al., 2011) which predicts orthologs, based on sequence homology, phylogenetic trees, and functional similarity (www.flyrnai.org/cgi-bin/DRSC_orthologs.pl). [file elife-51114-fig3-data1.xlsx]

## Sheet: ortho_human_mbl_inter_bru3_1w
Fly GeneID	Fly Gene ID	FlyBaseID	Fly Symbol	Species	Human GeneID	HGNCID	Human Symbol	DIOPT Score	Weighted Score	Rank	Best Score	Best Score Reverse	Prediction Derived From
Adh	3771877	FBgn0000055	Adh	Human	3248	5154	HPGD	7	6.61	moderate	Yes	No	Compara, eggNOG, OrthoDB, OrthoFinder, orthoMCL, Phylome, TreeFam
Bet1	40094	FBgn0260857	Bet1	Human	10282	14562	BET1	12	11.78	high	Yes	Yes	Compara, eggNOG, Hieranoid, Homologene, Inparanoid, OrthoFinder, OrthoInspector, orthoMCL, Panther, Phylome, RoundUp, TreeFam
Bet1	40094	FBgn0260857	Bet1	Human	51272	19348	BET1L	3	2.83	moderate	No	Yes	Compara, eggNOG, OrthoFinder
CG1077	40751	FBgn0037405	CG1077	Human	11005	15464	SPINK5	1	1.1	low	Yes	No	Panther
CG1077	40751	FBgn0037405	CG1077	Human	404203	29486	SPINK6	1	1.1	low	Yes	No	Panther
CG10924	37130	FBgn0034356	CG10924	Human	5106	8725	PCK2	14	13.75	high	Yes	Yes	Compara, eggNOG, Hieranoid, Inparanoid, Isobase, OMA, OrthoDB, OrthoFinder, OrthoInspector, orthoMCL, Panther, Phylome, RoundUp, TreeFam
CG10924	37130	FBgn0034356	CG10924	Human	5105	8724	PCK1	13	12.77	moderate	No	Yes	Compara, eggNOG, Hieranoid, Homologene, Inparanoid, OMA, OrthoDB, OrthoFinder, OrthoInspector, orthoMCL, Panther, Phylome, TreeFam
CG11912	33205	FBgn0031248	CG11912	Human	1504	2521	CTRB1	1	1.1	low	Yes	Yes	Panther
CG11912	33205	FBgn0031248	CG11912	Human	440387	2522	CTRB2	1	1.1	low	Yes	Yes	Panther
CG11912	33205	FBgn0031248	CG11912	Human	11330	2523	CTRC	1	1.1	low	Yes	Yes	Panther
CG11912	33205	FBgn0031248	CG11912	Human	1506	2524	CTRL	1	1.1	low	Yes	Yes	Panther
CG11912	33205	FBgn0031248	CG11912	Human	339501	29625	PRSS38	1	1.1	low	Yes	Yes	Panther
CG11912	33205	FBgn0031248	CG11912	Human	49	126	ACR	1	1	low	Yes	Yes	OrthoFinder
CG11912	33205	FBgn0031248	CG11912	Human	5657	9495	PRTN3	1	0.95	low	Yes	No	Isobase
CG11912	33205	FBgn0031248	CG11912	Human	566	913	AZU1	1	0.95	low	Yes	No	Isobase
CG13794	34048	FBgn0031936	CG13794	Human	6529	11042	SLC6A1	1	1.1	low	Yes	No	Panther
CG13794	34048	FBgn0031936	CG13794	Human	6538	11044	SLC6A11	1	1.1	low	Yes	No	Panther
CG13794	34048	FBgn0031936	CG13794	Human	6539	11045	SLC6A12	1	1.1	low	Yes	No	Panther
CG13794	34048	FBgn0031936	CG13794	Human	6540	11046	SLC6A13	1	1.1	low	Yes	No	Panther
CG13794	34048	FBgn0031936	CG13794	Human	11254	11047	SLC6A14	1	0.95	low	Yes	No	Isobase
CG15117	37197	FBgn0034417	CG15117	Human	2990	4696	GUSB	15	14.75	high	Yes	Yes	Compara, eggNOG, Hieranoid, Homologene, Inparanoid, Isobase, OMA, OrthoDB, OrthoFinder, OrthoInspector, orthoMCL, Panther, Phylome, RoundUp, TreeFam
CG16713	33591	FBgn0031560	CG16713	Human	100526773	38825	EPPIN-WFDC6	3	2.95	moderate	Yes	No	eggNOG, Hieranoid, Inparanoid
CG16713	33591	FBgn0031560	CG16713	Human	7980	11761	TFPI2	3	2.91	moderate	Yes	No	eggNOG, OrthoDB, OrthoFinder
CG16713	33591	FBgn0031560	CG16713	Human	7035	11760	TFPI	3	2.91	moderate	Yes	No	eggNOG, OrthoDB, OrthoFinder
CG16713	33591	FBgn0031560	CG16713	Human	10653	11247	SPINT2	2	1.9	low	No	No	eggNOG, OrthoFinder
CG16713	33591	FBgn0031560	CG16713	Human	140870	16164	WFDC6	2	1.9	low	No	No	eggNOG, Hieranoid
CG16965	34607	FBgn0032387	CG16965	Human	80162	26210	PGGHG	12	11.83	high	Yes	Yes	Compara, eggNOG, Hieranoid, Homologene, Inparanoid, Isobase, OrthoFinder, OrthoInspector, Panther, Phylome, RoundUp, TreeFam
CG18135	40073	FBgn0036837	CG18135	Human	56261	26957	GPCPD1	7	6.76	moderate	Yes	No	Compara, eggNOG, Isobase, OrthoDB, Panther, Phylome, TreeFam
CG2053	43762	FBgn0039887	CG2053	Human	9125	10445	CNOT9	5	4.97	moderate	Yes	No	eggNOG, OrthoDB, OrthoFinder, Panther, TreeFam
CG30281	246525	FBgn0050281	CG30281	Human	84929	25922	FIBCD1	6	6.06	moderate	Yes	No	eggNOG, Homologene, Inparanoid, OrthoDB, OrthoInspector, Panther
CG30281	246525	FBgn0050281	CG30281	Human	8547	3625	FCN3	5	4.96	moderate	No	Yes	eggNOG, Hieranoid, Inparanoid, OrthoDB, OrthoFinder
CG30281	246525	FBgn0050281	CG30281	Human	2220	3624	FCN2	5	4.96	moderate	No	No	eggNOG, Hieranoid, Inparanoid, OrthoDB, OrthoFinder
CG30281	246525	FBgn0050281	CG30281	Human	4239	7035	MFAP4	4	4.05	moderate	No	Yes	eggNOG, Inparanoid, OrthoFinder, Panther
CG30281	246525	FBgn0050281	CG30281	Human	2267	3695	FGL1	4	4.01	moderate	No	No	eggNOG, OrthoDB, OrthoFinder, Panther
CG30281	246525	FBgn0050281	CG30281	Human	2219	3623	FCN1	4	3.95	moderate	No	No	eggNOG, Hieranoid, Inparanoid, OrthoFinder
CG30281	246525	FBgn0050281	CG30281	Human	7143	11953	TNR	3	3.01	low	No	No	eggNOG, OrthoDB, Panther
CG30281	246525	FBgn0050281	CG30281	Human	253935	19705	ANGPTL5	3	3.01	moderate	No	Yes	eggNOG, OrthoDB, Panther
CG30281	246525	FBgn0050281	CG30281	Human	27329	491	ANGPTL3	3	3.01	moderate	No	Yes	eggNOG, OrthoDB, Panther
CG30281	246525	FBgn0050281	CG30281	Human	51129	16039	ANGPTL4	3	3.01	low	No	No	eggNOG, OrthoDB, Panther
CG30281	246525	FBgn0050281	CG30281	Human	51378	487	ANGPT4	3	3.01	low	No	No	eggNOG, OrthoDB, Panther
CG30281	246525	FBgn0050281	CG30281	Human	2244	3662	FGB	3	3.01	low	No	No	eggNOG, OrthoDB, Panther
CG30281	246525	FBgn0050281	CG30281	Human	63923	22942	TNN	3	3.01	low	No	No	eggNOG, OrthoDB, Panther
CG30281	246525	FBgn0050281	CG30281	Human	284	484	ANGPT1	3	3.01	low	No	No	eggNOG, OrthoDB, Panther
CG30281	246525	FBgn0050281	CG30281	Human	285	485	ANGPT2	3	3.01	low	No	No	eggNOG, OrthoDB, Panther
CG30281	246525	FBgn0050281	CG30281	Human	2266	3694	FGG	2	2	low	No	No	eggNOG, Panther
CG30281	246525	FBgn0050281	CG30281	Human	9068	489	ANGPTL1	2	1.91	low	No	No	eggNOG, OrthoDB
CG30281	246525	FBgn0050281	CG30281	Human	3371	5318	TNC	2	1.91	low	No	No	eggNOG, OrthoDB
CG30281	246525	FBgn0050281	CG30281	Human	23452	490	ANGPTL2	2	1.91	low	No	No	eggNOG, OrthoDB
CG30281	246525	FBgn0050281	CG30281	Human	83854	23140	ANGPTL6	2	1.91	low	No	No	eggNOG, OrthoDB
CG30281	246525	FBgn0050281	CG30281	Human	2243	3661	FGA	2	1.91	low	No	No	eggNOG, OrthoDB
CG30281	246525	FBgn0050281	CG30281	Human	10218	24078	ANGPTL7	2	1.91	low	No	No	eggNOG, OrthoDB
CG30281	246525	FBgn0050281	CG30281	Human	10875	3696	FGL2	2	1.91	low	No	No	eggNOG, OrthoDB
CG30438	246614	FBgn0050438	CG30438	Human	7368	12555	UGT8	10	9.84	high	Yes	Yes	eggNOG, Hieranoid, Homologene, Inparanoid, Isobase, OrthoInspector, orthoMCL, Panther, Phylome, RoundUp
CG30438	246614	FBgn0050438	CG30438	Human	10720	12545	UGT2B11	6	5.82	moderate	No	No	eggNOG, Hieranoid, OMA, orthoMCL, Panther, Phylome
CG30438	246614	FBgn0050438	CG30438	Human	7365	12544	UGT2B10	6	5.82	moderate	No	No	eggNOG, Hieranoid, OrthoDB, orthoMCL, Panther, Phylome
CG30438	246614	FBgn0050438	CG30438	Human	7363	12553	UGT2B4	5	4.81	moderate	No	No	eggNOG, Hieranoid, orthoMCL, Panther, Phylome
CG30438	246614	FBgn0050438	CG30438	Human	7366	12546	UGT2B15	5	4.81	moderate	No	No	eggNOG, Hieranoid, orthoMCL, Panther, Phylome
CG30438	246614	FBgn0050438	CG30438	Human	7367	12547	UGT2B17	5	4.81	moderate	No	No	eggNOG, Hieranoid, orthoMCL, Panther, Phylome
CG30438	246614	FBgn0050438	CG30438	Human	79799	28528	UGT2A3	5	4.81	moderate	No	No	eggNOG, Hieranoid, orthoMCL, Panther, Phylome
CG30438	246614	FBgn0050438	CG30438	Human	7364	12554	UGT2B7	5	4.81	moderate	No	No	eggNOG, Hieranoid, orthoMCL, Panther, Phylome
CG30438	246614	FBgn0050438	CG30438	Human	54575	12531	UGT1A10	4	4.02	moderate	No	No	Hieranoid, OrthoDB, Panther, Phylome
CG30438	246614	FBgn0050438	CG30438	Human	54576	12540	UGT1A8	4	4.02	moderate	No	No	Hieranoid, OrthoDB, Panther, Phylome
CG30438	246614	FBgn0050438	CG30438	Human	54658	12530	UGT1A1	4	3.91	moderate	No	No	eggNOG, Hieranoid, Panther, Phylome
CG30438	246614	FBgn0050438	CG30438	Human	54490	13479	UGT2B28	4	3.91	moderate	No	No	eggNOG, Hieranoid, Panther, Phylome
CG30438	246614	FBgn0050438	CG30438	Human	54659	12535	UGT1A3	4	3.91	moderate	No	No	eggNOG, Hieranoid, Panther, Phylome
CG30438	246614	FBgn0050438	CG30438	Human	133688	26625	UGT3A1	4	3.84	moderate	No	No	Compara, eggNOG, Panther, Phylome
CG30438	246614	FBgn0050438	CG30438	Human	167127	27266	UGT3A2	4	3.84	moderate	No	No	Compara, eggNOG, Panther, Phylome
CG30438	246614	FBgn0050438	CG30438	Human	574537	28183	UGT2A2	4	3.71	moderate	No	No	eggNOG, Hieranoid, orthoMCL, Phylome
CG30438	246614	FBgn0050438	CG30438	Human	54657	12536	UGT1A4	3	3.01	low	No	No	Hieranoid, Panther, Phylome
CG30438	246614	FBgn0050438	CG30438	Human	54577	12539	UGT1A7	3	3.01	low	No	No	Hieranoid, Panther, Phylome
CG30438	246614	FBgn0050438	CG30438	Human	54579	12537	UGT1A5	3	3.01	low	No	No	Hieranoid, Panther, Phylome
CG30438	246614	FBgn0050438	CG30438	Human	54600	12541	UGT1A9	3	3.01	low	No	No	Hieranoid, Panther, Phylome
CG30438	246614	FBgn0050438	CG30438	Human	54578	12538	UGT1A6	3	3.01	low	No	No	Hieranoid, Panther, Phylome
CG31229	318636	FBgn0051229	CG31229	Human	29928	17317	TIMM22	15	14.75	high	Yes	Yes	Compara, eggNOG, Hieranoid, Homologene, Inparanoid, Isobase, OMA, OrthoDB, OrthoFinder, OrthoInspector, orthoMCL, Panther, Phylome, RoundUp, TreeFam
CG31286	318662	FBgn0051286	CG31286	Human	152007	18007	GLIPR2	4	3.78	moderate	Yes	No	eggNOG, OrthoDB, Phylome, TreeFam
CG31286	318662	FBgn0051286	CG31286	Human	144321	28592	GLIPR1L2	2	1.91	low	No	No	eggNOG, OrthoDB
CG31286	318662	FBgn0051286	CG31286	Human	7180	12024	CRISP2	2	1.91	low	No	No	eggNOG, OrthoDB
CG31286	318662	FBgn0051286	CG31286	Human	11010	17001	GLIPR1	2	1.91	low	No	No	eggNOG, OrthoDB
CG31286	318662	FBgn0051286	CG31286	Human	256710	28392	GLIPR1L1	2	1.91	low	No	No	eggNOG, OrthoDB
CG31286	318662	FBgn0051286	CG31286	Human	167	304	CRISP1	2	1.91	low	No	No	eggNOG, OrthoDB
CG31286	318662	FBgn0051286	CG31286	Human	51050	8946	PI15	2	1.91	low	No	No	eggNOG, OrthoDB
CG31286	318662	FBgn0051286	CG31286	Human	221476	21245	PI16	2	1.91	low	No	No	eggNOG, OrthoDB
CG31286	318662	FBgn0051286	CG31286	Human	83716	25248	CRISPLD2	2	1.91	low	No	No	eggNOG, OrthoDB
CG31286	318662	FBgn0051286	CG31286	Human	83690	18206	CRISPLD1	2	1.91	low	No	No	eggNOG, OrthoDB
CG31286	318662	FBgn0051286	CG31286	Human	497190	33849	CLEC18B	2	1.91	low	No	No	eggNOG, OrthoDB
CG31286	318662	FBgn0051286	CG31286	Human	140902	16249	R3HDML	2	1.91	low	No	No	eggNOG, OrthoDB
CG34377	42608	FBgn0263117	CG34377	Human	389432	21180	SAMD5	7	6.85	high	Yes	Yes	Compara, OrthoDB, OrthoFinder, OrthoInspector, orthoMCL, Panther, Phylome
CG34377	42608	FBgn0263117	CG34377	Human	64092	10528	SAMSN1	4	4.01	moderate	No	No	eggNOG, OrthoDB, OrthoInspector, Panther
CG34377	42608	FBgn0263117	CG34377	Human	23328	19182	SASH1	3	3.11	low	No	No	OrthoDB, OrthoInspector, Panther
CG34377	42608	FBgn0263117	CG34377	Human	54440	15975	SASH3	3	3.11	low	No	No	OrthoDB, OrthoInspector, Panther
CG3502	37695	FBgn0046253	CG3502	Human	9520	7900	NPEPPS	3	3	moderate	Yes	No	eggNOG, OrthoFinder, Panther
CG3502	37695	FBgn0046253	CG3502	Human	51752	18173	ERAP1	3	3	moderate	Yes	No	eggNOG, OrthoFinder, Panther
CG3502	37695	FBgn0046253	CG3502	Human	64167	29499	ERAP2	3	3	moderate	Yes	No	eggNOG, OrthoFinder, Panther
CG3502	37695	FBgn0046253	CG3502	Human	206338	26904	LVRN	3	2.78	high	Yes	Yes	Compara, eggNOG, Isobase
CG3502	37695	FBgn0046253	CG3502	Human	4012	6656	LNPEP	2	2	low	No	No	eggNOG, Panther
CG3502	37695	FBgn0046253	CG3502	Human	290	500	ANPEP	2	1.83	low	No	No	Compara, eggNOG
CG3603	31289	FBgn0029648	CG3603	Human	7923	3554	HSD17B8	15	14.75	high	Yes	Yes	Compara, eggNOG, Hieranoid, Homologene, Inparanoid, Isobase, OMA, OrthoDB, OrthoFinder, OrthoInspector, orthoMCL, Panther, Phylome, RoundUp, TreeFam
CG3603	31289	FBgn0029648	CG3603	Human	84869	25891	CBR4	5	4.84	moderate	No	Yes	eggNOG, OrthoDB, OrthoFinder, orthoMCL, RoundUp
CG43366	35519	FBgn0263109	CG43366	Human	5276	8945	SERPINI2	1	1.1	low	Yes	No	Panther
CG43366	35519	FBgn0263109	CG43366	Human	5269	8950	SERPINB6	1	1.1	low	Yes	No	Panther
CG43366	35519	FBgn0263109	CG43366	Human	6317	10569	SERPINB3	1	1.1	low	Yes	No	Panther
CG43366	35519	FBgn0263109	CG43366	Human	5275	8944	SERPINB13	1	1.1	low	Yes	No	Panther
CG43366	35519	FBgn0263109	CG43366	Human	6318	10570	SERPINB4	1	1.1	low	Yes	No	Panther
CG43366	35519	FBgn0263109	CG43366	Human	5271	8952	SERPINB8	1	1.1	low	Yes	No	Panther
CG43366	35519	FBgn0263109	CG43366	Human	89777	14220	SERPINB12	1	1.1	low	Yes	No	Panther
CG43366	35519	FBgn0263109	CG43366	Human	5272	8955	SERPINB9	1	1.1	low	Yes	No	Panther
CG4306	40017	FBgn0036787	CG4306	Human	79017	21705	GGCT	15	14.75	high	Yes	Yes	Compara, eggNOG, Hieranoid, Homologene, Inparanoid, Isobase, OMA, OrthoDB, OrthoFinder, OrthoInspector, orthoMCL, Panther, Phylome, RoundUp, TreeFam
CG4860	41480	FBgn0037999	CG4860	Human	35	90	ACADS	7	6.7	moderate	Yes	No	Compara, eggNOG, Hieranoid, orthoMCL, Panther, Phylome, TreeFam
CG4860	41480	FBgn0037999	CG4860	Human	36	91	ACADSB	3	2.75	low	No	No	eggNOG, Isobase, orthoMCL
CG6168	39273	FBgn0036154	CG6168	Human	25797	9753	QPCT	8	7.83	moderate	Yes	No	eggNOG, Isobase, OrthoDB, OrthoFinder, OrthoInspector, Panther, Phylome, TreeFam
CG6168	39273	FBgn0036154	CG6168	Human	54814	25952	QPCTL	7	6.88	moderate	No	No	eggNOG, OrthoDB, OrthoFinder, OrthoInspector, Panther, Phylome, TreeFam
CG7227	34088	FBgn0031970	CG7227	Human	949	1664	SCARB1	6	5.75	moderate	Yes	No	Compara, eggNOG, Hieranoid, OrthoDB, OrthoFinder, Phylome
CG7227	34088	FBgn0031970	CG7227	Human	948	1663	CD36	4	3.86	moderate	No	No	eggNOG, Isobase, OrthoDB, OrthoFinder
CG7227	34088	FBgn0031970	CG7227	Human	950	1665	SCARB2	3	2.91	low	No	No	eggNOG, OrthoDB, OrthoFinder
CG9240	32505	FBgn0030669	CG9240	Human	196294	26317	IMMP1L	15	14.75	high	Yes	Yes	Compara, eggNOG, Hieranoid, Homologene, Inparanoid, Isobase, OMA, OrthoDB, OrthoFinder, OrthoInspector, orthoMCL, Panther, Phylome, RoundUp, TreeFam
CG9664	33540	FBgn0031515	CG9664	Human	64137	13884	ABCG4	6	6	moderate	Yes	No	eggNOG, OrthoDB, OrthoFinder, Panther, RoundUp, TreeFam
CG9664	33540	FBgn0031515	CG9664	Human	9619	73	ABCG1	5	4.99	moderate	No	No	eggNOG, OrthoFinder, Panther, RoundUp, TreeFam
CG9664	33540	FBgn0031515	CG9664	Human	64241	13887	ABCG8	4	3.86	moderate	No	Yes	eggNOG, Isobase, OrthoDB, OrthoFinder
CG9664	33540	FBgn0031515	CG9664	Human	9429	74	ABCG2	3	3.04	low	No	No	OrthoDB, OrthoFinder, RoundUp
CG9664	33540	FBgn0031515	CG9664	Human	64240	13886	ABCG5	3	2.91	low	No	No	eggNOG, OrthoDB, OrthoFinder
Cpsf73	42240	FBgn0261065	Cpsf73	Human	51692	2326	CPSF3	15	14.75	high	Yes	Yes	Compara, eggNOG, Hieranoid, Homologene, Inparanoid, Isobase, OMA, OrthoDB, OrthoFinder, OrthoInspector, orthoMCL, Panther, Phylome, RoundUp, TreeFam
Cpsf73	42240	FBgn0261065	Cpsf73	Human	54973	26052	INTS11	2	1.91	low	No	No	eggNOG, OrthoDB
Cyp28d1	33749	FBgn0031689	Cyp28d1	Human	6916	11609	TBXAS1	5	4.71	moderate	Yes	No	Compara, eggNOG, OrthoDB, Phylome, TreeFam
Cyp28d1	33749	FBgn0031689	Cyp28d1	Human	64816	17450	CYP3A43	4	3.75	moderate	No	No	Compara, eggNOG, OrthoDB, Phylome
Cyp28d1	33749	FBgn0031689	Cyp28d1	Human	1576	2637	CYP3A4	4	3.75	moderate	No	No	Compara, eggNOG, OrthoDB, Phylome
Cyp28d1	33749	FBgn0031689	Cyp28d1	Human	1577	2638	CYP3A5	4	3.75	moderate	No	No	Compara, eggNOG, OrthoDB, Phylome
Cyp28d1	33749	FBgn0031689	Cyp28d1	Human	100861540	51504	CYP3A7-CYP3A51P	3	2.85	low	No	No	Compara, OrthoDB, Phylome
Cyp28d1	33749	FBgn0031689	Cyp28d1	Human	1551	2640	CYP3A7	2	1.83	low	No	No	Compara, eggNOG
Cyp28d2	33748	FBgn0031688	Cyp28d2	Human	6916	11609	TBXAS1	5	4.71	moderate	Yes	No	Compara, eggNOG, OrthoDB, Phylome, TreeFam
Cyp28d2	33748	FBgn0031688	Cyp28d2	Human	64816	17450	CYP3A43	4	3.75	moderate	No	No	Compara, eggNOG, OrthoDB, Phylome
Cyp28d2	33748	FBgn0031688	Cyp28d2	Human	1576	2637	CYP3A4	4	3.75	moderate	No	No	Compara, eggNOG, OrthoDB, Phylome
Cyp28d2	33748	FBgn0031688	Cyp28d2	Human	1577	2638	CYP3A5	4	3.75	moderate	No	No	Compara, eggNOG, OrthoDB, Phylome
Cyp28d2	33748	FBgn0031688	Cyp28d2	Human	100861540	51504	CYP3A7-CYP3A51P	3	2.85	low	No	No	Compara, OrthoDB, Phylome
Cyp28d2	33748	FBgn0031688	Cyp28d2	Human	1551	2640	CYP3A7	2	1.83	low	No	No	Compara, eggNOG
Cyp4ac1	33754	FBgn0031693	Cyp4ac1	Human	285440	23198	CYP4V2	4	3.91	moderate	Yes	No	eggNOG, OrthoDB, orthoMCL, Panther
Cyp4ac1	33754	FBgn0031693	Cyp4ac1	Human	199974	20583	CYP4Z1	4	3.81	moderate	Yes	No	eggNOG, OrthoDB, OrthoFinder, orthoMCL
Cyp4ac1	33754	FBgn0031693	Cyp4ac1	Human	1580	2644	CYP4B1	4	3.81	high	Yes	Yes	eggNOG, OrthoDB, OrthoFinder, orthoMCL
Cyp4ac1	33754	FBgn0031693	Cyp4ac1	Human	57834	13265	CYP4F11	4	3.81	high	Yes	Yes	eggNOG, OrthoDB, OrthoFinder, orthoMCL
Cyp4ac1	33754	FBgn0031693	Cyp4ac1	Human	126410	26820	CYP4F22	4	3.81	high	Yes	Yes	eggNOG, OrthoDB, OrthoFinder, orthoMCL
Cyp4ac1	33754	FBgn0031693	Cyp4ac1	Human	66002	18857	CYP4F12	4	3.81	high	Yes	Yes	eggNOG, OrthoDB, OrthoFinder, orthoMCL
Cyp4ac1	33754	FBgn0031693	Cyp4ac1	Human	1588	2594	CYP19A1	3	2.95	moderate	No	Yes	eggNOG, Isobase, Panther
Cyp4ac1	33754	FBgn0031693	Cyp4ac1	Human	11283	2648	CYP4F8	3	2.91	moderate	No	Yes	OrthoDB, OrthoFinder, orthoMCL
Cyp4ac1	33754	FBgn0031693	Cyp4ac1	Human	260293	20244	CYP4X1	3	2.81	low	No	No	eggNOG, OrthoDB, orthoMCL
Cyp4ac1	33754	FBgn0031693	Cyp4ac1	Human	1579	2642	CYP4A11	3	2.8	low	No	No	eggNOG, OrthoFinder, orthoMCL
Cyp4ac1	33754	FBgn0031693	Cyp4ac1	Human	4051	2646	CYP4F3	3	2.8	low	No	No	eggNOG, OrthoFinder, orthoMCL
Cyp4ac1	33754	FBgn0031693	Cyp4ac1	Human	8529	2645	CYP4F2	3	2.8	low	No	No	eggNOG, OrthoFinder, orthoMCL
Cyp4ac1	33754	FBgn0031693	Cyp4ac1	Human	284541	20575	CYP4A22	3	2.8	low	No	No	eggNOG, OrthoFinder, orthoMCL
Cyp6a2	35587	FBgn0000473	Cyp6a2	Human	6916	11609	TBXAS1	7	6.7	moderate	Yes	No	Compara, eggNOG, Homologene, Isobase, OrthoDB, OrthoInspector, Phylome
Cyp6a2	35587	FBgn0000473	Cyp6a2	Human	64816	17450	CYP3A43	7	6.65	moderate	Yes	No	Compara, eggNOG, Hieranoid, OrthoDB, OrthoInspector, orthoMCL, Phylome
Cyp6a2	35587	FBgn0000473	Cyp6a2	Human	1576	2637	CYP3A4	7	6.65	moderate	Yes	No	Compara, eggNOG, Hieranoid, OrthoDB, OrthoInspector, orthoMCL, Phylome
Cyp6a2	35587	FBgn0000473	Cyp6a2	Human	1577	2638	CYP3A5	7	6.65	moderate	Yes	No	Compara, eggNOG, Hieranoid, OrthoDB, OrthoInspector, orthoMCL, Phylome
Cyp6a2	35587	FBgn0000473	Cyp6a2	Human	100861540	51504	CYP3A7-CYP3A51P	5	4.85	moderate	No	No	Compara, Hieranoid, OrthoDB, OrthoInspector, Phylome
Cyp6a2	35587	FBgn0000473	Cyp6a2	Human	1551	2640	CYP3A7	3	2.73	low	No	No	Compara, eggNOG, orthoMCL
Cyp6a23	36661	FBgn0033978	Cyp6a23	Human	1576	2637	CYP3A4	8	7.68	moderate	Yes	No	Compara, eggNOG, Hieranoid, OrthoDB, OrthoInspector, orthoMCL, Phylome, RoundUp
Cyp6a23	36661	FBgn0033978	Cyp6a23	Human	6916	11609	TBXAS1	7	6.78	moderate	No	No	Compara, eggNOG, Homologene, OrthoDB, OrthoInspector, Phylome, RoundUp
Cyp6a23	36661	FBgn0033978	Cyp6a23	Human	64816	17450	CYP3A43	7	6.65	moderate	No	No	Compara, eggNOG, Hieranoid, OrthoDB, OrthoInspector, orthoMCL, Phylome
Cyp6a23	36661	FBgn0033978	Cyp6a23	Human	1577	2638	CYP3A5	7	6.65	moderate	No	No	Compara, eggNOG, Hieranoid, OrthoDB, OrthoInspector, orthoMCL, Phylome
Cyp6a23	36661	FBgn0033978	Cyp6a23	Human	100861540	51504	CYP3A7-CYP3A51P	5	4.85	moderate	No	No	Compara, Hieranoid, OrthoDB, OrthoInspector, Phylome
Cyp6a23	36661	FBgn0033978	Cyp6a23	Human	1551	2640	CYP3A7	3	2.73	low	No	No	Compara, eggNOG, orthoMCL
Cyp6g1	36316	FBgn0025454	Cyp6g1	Human	64816	17450	CYP3A43	6	5.75	moderate	Yes	No	Compara, eggNOG, Hieranoid, OrthoDB, OrthoInspector, Phylome
Cyp6g1	36316	FBgn0025454	Cyp6g1	Human	1576	2637	CYP3A4	6	5.75	moderate	Yes	No	Compara, eggNOG, Hieranoid, OrthoDB, OrthoInspector, Phylome
Cyp6g1	36316	FBgn0025454	Cyp6g1	Human	1577	2638	CYP3A5	6	5.75	moderate	Yes	No	Compara, eggNOG, Hieranoid, OrthoDB, OrthoInspector, Phylome
Cyp6g1	36316	FBgn0025454	Cyp6g1	Human	100861540	51504	CYP3A7-CYP3A51P	5	4.85	moderate	No	No	Compara, Hieranoid, OrthoDB, OrthoInspector, Phylome
Cyp6g1	36316	FBgn0025454	Cyp6g1	Human	6916	11609	TBXAS1	5	4.75	moderate	No	No	Compara, eggNOG, OrthoDB, OrthoInspector, Phylome
Cyp6g1	36316	FBgn0025454	Cyp6g1	Human	1551	2640	CYP3A7	2	1.83	low	No	No	Compara, eggNOG
Est-Q	40381	FBgn0037090	Est-Q	Human	283848	26741	CES4A	4	3.87	moderate	Yes	No	eggNOG, OrthoDB, OrthoFinder, TreeFam
Est-Q	40381	FBgn0037090	Est-Q	Human	221223	26459	CES5A	4	3.87	moderate	Yes	No	eggNOG, OrthoDB, OrthoFinder, TreeFam
Est-Q	40381	FBgn0037090	Est-Q	Human	23491	1865	CES3	4	3.87	moderate	Yes	No	eggNOG, OrthoDB, OrthoFinder, TreeFam
Est-Q	40381	FBgn0037090	Est-Q	Human	8824	1864	CES2	3	2.91	low	No	No	eggNOG, OrthoDB, OrthoFinder
Est-Q	40381	FBgn0037090	Est-Q	Human	1066	1863	CES1	3	2.91	low	No	No	eggNOG, OrthoDB, OrthoFinder
Est-Q	40381	FBgn0037090	Est-Q	Human	1056	1848	CEL	3	2.91	low	No	No	eggNOG, OrthoDB, OrthoFinder
Est-Q	40381	FBgn0037090	Est-Q	Human	57555	14290	NLGN2	2	1.9	low	No	No	eggNOG, OrthoFinder
Est-Q	40381	FBgn0037090	Est-Q	Human	57502	14287	NLGN4X	2	1.9	low	No	No	eggNOG, OrthoFinder
Est-Q	40381	FBgn0037090	Est-Q	Human	22871	14291	NLGN1	2	1.9	low	No	No	eggNOG, OrthoFinder
Est-Q	40381	FBgn0037090	Est-Q	Human	54413	14289	NLGN3	2	1.9	low	No	No	eggNOG, OrthoFinder
Est-Q	40381	FBgn0037090	Est-Q	Human	22829	15529	NLGN4Y	2	1.9	low	No	No	eggNOG, OrthoFinder
Galt	33935	FBgn0263200	Galt	Human	2592	4135	GALT	14	13.8	high	Yes	Yes	Compara, eggNOG, Hieranoid, Homologene, Inparanoid, OMA, OrthoDB, OrthoFinder, OrthoInspector, orthoMCL, Panther, Phylome, RoundUp, TreeFam
GstE5	37110	FBgn0063495	GstE5	Human	653689	33437	GSTT2B	3	2.8	moderate	Yes	No	eggNOG, OrthoFinder, orthoMCL
GstE5	37110	FBgn0063495	GstE5	Human	2952	4641	GSTT1	3	2.8	moderate	Yes	No	eggNOG, OrthoFinder, orthoMCL
GstE5	37110	FBgn0063495	GstE5	Human	2953	4642	GSTT2	3	2.8	moderate	Yes	No	eggNOG, OrthoFinder, orthoMCL
Hsp70Ab	44920	FBgn0013276	Hsp70Ab	Human	3303	5232	HSPA1A	5	4.9	high	Yes	Yes	eggNOG, Homologene, OrthoFinder, orthoMCL, Panther
Hsp70Ab	44920	FBgn0013276	Hsp70Ab	Human	3304	5233	HSPA1B	5	4.9	moderate	Yes	No	eggNOG, Homologene, OrthoFinder, orthoMCL, Panther
Hsp70Ab	44920	FBgn0013276	Hsp70Ab	Human	3305	5234	HSPA1L	4	3.9	moderate	No	No	eggNOG, OrthoFinder, orthoMCL, Panther
Hsp70Ab	44920	FBgn0013276	Hsp70Ab	Human	3310	5239	HSPA6	4	3.9	moderate	No	No	eggNOG, OrthoFinder, orthoMCL, Panther
Hsp70Ab	44920	FBgn0013276	Hsp70Ab	Human	3312	5241	HSPA8	3	2.8	low	No	No	eggNOG, OrthoFinder, orthoMCL
Hsp70Ab	44920	FBgn0013276	Hsp70Ab	Human	3309	5238	HSPA5	3	2.8	low	No	No	eggNOG, OrthoFinder, orthoMCL
Hsp70Ab	44920	FBgn0013276	Hsp70Ab	Human	3306	5235	HSPA2	3	2.8	low	No	No	eggNOG, OrthoFinder, orthoMCL
Hsp70Bb	48582	FBgn0013278	Hsp70Bb	Human	3303	5232	HSPA1A	5	4.9	high	Yes	Yes	eggNOG, Homologene, OrthoFinder, orthoMCL, Panther
Hsp70Bb	48582	FBgn0013278	Hsp70Bb	Human	3304	5233	HSPA1B	5	4.9	moderate	Yes	No	eggNOG, Homologene, OrthoFinder, orthoMCL, Panther
Hsp70Bb	48582	FBgn0013278	Hsp70Bb	Human	3305	5234	HSPA1L	4	3.9	moderate	No	No	eggNOG, OrthoFinder, orthoMCL, Panther
Hsp70Bb	48582	FBgn0013278	Hsp70Bb	Human	3310	5239	HSPA6	4	3.9	moderate	No	No	eggNOG, OrthoFinder, orthoMCL, Panther
Hsp70Bb	48582	FBgn0013278	Hsp70Bb	Human	3312	5241	HSPA8	3	2.8	low	No	No	eggNOG, OrthoFinder, orthoMCL
Hsp70Bb	48582	FBgn0013278	Hsp70Bb	Human	3309	5238	HSPA5	3	2.8	low	No	No	eggNOG, OrthoFinder, orthoMCL
Hsp70Bb	48582	FBgn0013278	Hsp70Bb	Human	3306	5235	HSPA2	3	2.8	low	No	No	eggNOG, OrthoFinder, orthoMCL
Ir76a	40157	FBgn0260874	Ir76a	Human	2895	4576	GRID2	1	0.91	low	Yes	No	Phylome
JTBR	38235	FBgn0025820	JTBR	Human	10899	6201	JTB	11	10.87	high	Yes	Yes	eggNOG, Hieranoid, Inparanoid, OMA, OrthoDB, OrthoFinder, orthoMCL, Panther, Phylome, RoundUp, TreeFam
Klp54D	47216	FBgn0263076	Klp54D	Human	113220	21495	KIF12	13	12.74	high	Yes	Yes	Compara, eggNOG, Hieranoid, Homologene, Inparanoid, Isobase, OrthoDB, OrthoInspector, orthoMCL, Panther, Phylome, RoundUp, TreeFam
Mgstl	44110	FBgn0025814	Mgstl	Human	4257	7061	MGST1	11	10.88	high	Yes	Yes	Compara, eggNOG, Homologene, Inparanoid, OMA, OrthoFinder, OrthoInspector, orthoMCL, Panther, RoundUp, TreeFam
Mgstl	44110	FBgn0025814	Mgstl	Human	9536	9599	PTGES	4	3.89	moderate	No	No	Compara, orthoMCL, Panther, TreeFam
Nnp-1	44391	FBgn0022069	Nnp-1	Human	23076	23818	RRP1B	12	11.79	high	Yes	Yes	Compara, eggNOG, Hieranoid, Inparanoid, OrthoDB, OrthoFinder, OrthoInspector, orthoMCL, Panther, Phylome, RoundUp, TreeFam
Nnp-1	44391	FBgn0022069	Nnp-1	Human	8568	18785	RRP1	12	11.79	high	Yes	Yes	Compara, eggNOG, Hieranoid, Inparanoid, OrthoDB, OrthoFinder, OrthoInspector, orthoMCL, Panther, Phylome, RoundUp, TreeFam
Odc2	35767	FBgn0013308	Odc2	Human	4953	8109	ODC1	13	12.77	moderate	Yes	No	Compara, eggNOG, Hieranoid, Homologene, Inparanoid, OMA, OrthoDB, OrthoFinder, OrthoInspector, orthoMCL, Panther, Phylome, TreeFam
Odc2	35767	FBgn0013308	Odc2	Human	51582	16432	AZIN1	11	10.87	moderate	No	Yes	Compara, eggNOG, Hieranoid, Inparanoid, OMA, OrthoDB, OrthoFinder, OrthoInspector, Panther, Phylome, TreeFam
Odc2	35767	FBgn0013308	Odc2	Human	113451	29957	AZIN2	11	10.87	moderate	No	Yes	Compara, eggNOG, Hieranoid, Inparanoid, OMA, OrthoDB, OrthoFinder, OrthoInspector, Panther, Phylome, TreeFam
Rgk2	37132	FBgn0085419	Rgk2	Human	28954	15922	REM1	7	6.93	high	Yes	Yes	Compara, Homologene, OrthoInspector, Panther, Phylome, RoundUp, TreeFam
Rgk2	37132	FBgn0085419	Rgk2	Human	6236	10446	RRAD	6	5.93	moderate	No	No	Compara, OrthoInspector, Panther, Phylome, RoundUp, TreeFam
Rgk2	37132	FBgn0085419	Rgk2	Human	2669	4234	GEM	5	4.9	moderate	No	Yes	Compara, OrthoInspector, Panther, Phylome, TreeFam
Rgk2	37132	FBgn0085419	Rgk2	Human	161253	20248	REM2	5	4.9	moderate	No	Yes	Compara, OrthoInspector, Panther, Phylome, TreeFam
Rh7	39389	FBgn0036260	Rh7	Human	94233	14449	OPN4	3	2.84	moderate	Yes	No	Compara, Hieranoid, Phylome
Rh7	39389	FBgn0036260	Rh7	Human	23596	14007	OPN3	2	1.94	moderate	No	Yes	Compara, OrthoDB
Rh7	39389	FBgn0036260	Rh7	Human	10692	10450	RRH	2	1.94	moderate	No	Yes	Compara, OrthoDB
RpL29	37430	FBgn0016726	RpL29	Human	6159	10331	RPL29	9	8.8	high	Yes	Yes	Compara, eggNOG, Inparanoid, OrthoDB, OrthoFinder, OrthoInspector, orthoMCL, Panther, Phylome
RpL23	37628	FBgn0010078	RpL23	Human	9349	10316	RPL23	14	13.8	high	Yes	Yes	Compara, eggNOG, Hieranoid, Homologene, Inparanoid, OMA, OrthoDB, OrthoFinder, OrthoInspector, orthoMCL, Panther, Phylome, RoundUp, TreeFam
RpL36	31009	FBgn0002579	RpL36	Human	25873	13631	RPL36	12	11.84	high	Yes	Yes	Compara, eggNOG, Hieranoid, Inparanoid, OMA, OrthoDB, OrthoFinder, OrthoInspector, orthoMCL, Panther, Phylome, RoundUp
RpL36	31009	FBgn0002579	RpL36	Human	347292	35734	RPL36P14	3	2.91	moderate	No	Yes	Hieranoid, OrthoInspector, Phylome
RpS28b	31897	FBgn0030136	RpS28b	Human	6234	10418	RPS28	13	12.9	high	Yes	Yes	Compara, eggNOG, Hieranoid, Homologene, Inparanoid, OMA, OrthoDB, OrthoFinder, OrthoInspector, Panther, Phylome, RoundUp, TreeFam
Spn75F	317912	FBgn0052203	Spn75F	Human	5345	9075	SERPINF2	2	2.01	high	Yes	Yes	Panther, Phylome
Surf6	42370	FBgn0038746	Surf6	Human	6838	11478	SURF6	8	7.87	high	Yes	Yes	Compara, eggNOG, Hieranoid, Inparanoid, orthoMCL, Panther, RoundUp, TreeFam
Syn1	40424	FBgn0037130	Syn1	Human	6641	11168	SNTB1	13	12.87	high	Yes	Yes	eggNOG, Hieranoid, Homologene, Inparanoid, OMA, OrthoDB, OrthoFinder, OrthoInspector, orthoMCL, Panther, Phylome, RoundUp, TreeFam
Syn1	40424	FBgn0037130	Syn1	Human	6645	11169	SNTB2	11	10.97	moderate	No	Yes	Hieranoid, Inparanoid, OMA, OrthoDB, OrthoFinder, OrthoInspector, orthoMCL, Panther, Phylome, RoundUp, TreeFam
Syn1	40424	FBgn0037130	Syn1	Human	6640	11167	SNTA1	9	8.96	moderate	No	Yes	Compara, Hieranoid, Inparanoid, OrthoDB, OrthoFinder, OrthoInspector, Panther, Phylome, TreeFam
Tep1	34937	FBgn0041183	Tep1	Human	135228	21685	CD109	10	9.91	moderate	Yes	No	Compara, Hieranoid, Inparanoid, OMA, OrthoDB, OrthoFinder, OrthoInspector, orthoMCL, Panther, Phylome
Tep1	34937	FBgn0041183	Tep1	Human	718	1318	C3	2	1.86	low	No	No	eggNOG, TreeFam
Tep1	34937	FBgn0041183	Tep1	Human	727	1331	C5	2	1.86	low	No	No	eggNOG, TreeFam
Tep1	34937	FBgn0041183	Tep1	Human	721	1324	C4B	2	1.86	moderate	No	Yes	eggNOG, TreeFam
Tep1	34937	FBgn0041183	Tep1	Human	720	1323	C4A	2	1.86	low	No	No	eggNOG, TreeFam
Tim17b1	40635	FBgn0037310	Tim17b1	Human	10245	17310	TIMM17B	9	8.71	moderate	Yes	No	Compara, eggNOG, Hieranoid, OrthoDB, OrthoFinder, orthoMCL, Panther, Phylome, TreeFam
Tim17b1	40635	FBgn0037310	Tim17b1	Human	10440	17315	TIMM17A	9	8.71	moderate	Yes	No	Compara, eggNOG, Hieranoid, OrthoDB, OrthoFinder, orthoMCL, Panther, Phylome, TreeFam
Tom7	35899	FBgn0033357	Tom7	Human	54543	21648	TOMM7	10	9.8	high	Yes	Yes	eggNOG, Hieranoid, Inparanoid, Isobase, OrthoFinder, orthoMCL, Panther, Phylome, RoundUp, TreeFam
inaD	37629	FBgn0001263	inaD	Human	84708	6657	LNX1	4	4.11	high	Yes	Yes	Hieranoid, Inparanoid, Panther, TreeFam
inaD	37629	FBgn0001263	inaD	Human	222484	20421	LNX2	4	4.11	high	Yes	Yes	Hieranoid, Inparanoid, Panther, TreeFam
inaD	37629	FBgn0001263	inaD	Human	8777	7208	MPDZ	2	2	low	No	No	orthoMCL, Panther
inaD	37629	FBgn0001263	inaD	Human	10207	28881	PATJ	2	2	low	No	No	orthoMCL, Panther
inaD	37629	FBgn0001263	inaD	Human	7082	11827	TJP1	2	1.96	low	No	No	Isobase, OrthoDB
inaD	37629	FBgn0001263	inaD	Human	143162	28572	FRMPD2	1	1.1	low	No	No	Panther
l(2)k12914	34159	FBgn0263852	l(2)k12914	Human	1603	2664	DAD1	14	13.8	high	Yes	Yes	Compara, eggNOG, Hieranoid, Homologene, Inparanoid, OMA, OrthoDB, OrthoFinder, OrthoInspector, orthoMCL, Panther, Phylome, RoundUp, TreeFam
mRpL12	44326	FBgn0011787	mRpL12	Human	6182	10378	MRPL12	12	11.78	high	Yes	Yes	Compara, eggNOG, Hieranoid, Homologene, Inparanoid, OrthoFinder, OrthoInspector, orthoMCL, Panther, Phylome, RoundUp, TreeFam
mt:ND4L	19893552	FBgn0013683	ND4L	Human	4539	7460	ND4L	10	9.97	high	Yes	Yes	eggNOG, Hieranoid, Inparanoid, OMA, OrthoDB, OrthoFinder, Panther, Phylome, RoundUp, TreeFam
ox	45401	FBgn0011227	ox	Human	29796	30863	UQCR10	11	10.89	high	Yes	Yes	Compara, eggNOG, Hieranoid, Inparanoid, OMA, OrthoFinder, OrthoInspector, Panther, Phylome, RoundUp, TreeFam
stj	36526	FBgn0261041	stj	Human	55799	15460	CACNA2D3	15	14.75	high	Yes	Yes	Compara, eggNOG, Hieranoid, Homologene, Inparanoid, Isobase, OMA, OrthoDB, OrthoFinder, OrthoInspector, orthoMCL, Panther, Phylome, RoundUp, TreeFam
stj	36526	FBgn0261041	stj	Human	93589	20202	CACNA2D4	13	12.8	moderate	No	Yes	Compara, eggNOG, Hieranoid, Inparanoid, OMA, OrthoDB, OrthoFinder, OrthoInspector, orthoMCL, Panther, Phylome, RoundUp, TreeFam
stj	36526	FBgn0261041	stj	Human	781	1399	CACNA2D1	3	3.01	moderate	No	Yes	eggNOG, OrthoDB, Panther
stj	36526	FBgn0261041	stj	Human	9254	1400	CACNA2D2	3	3.01	low	No	No	eggNOG, OrthoDB, Panther
ttm2	38049	FBgn0035124	ttm2	Human	92609	23656	TIMM50	12	11.84	moderate	Yes	No	Compara, eggNOG, Hieranoid, Inparanoid, Isobase, OrthoDB, OrthoFinder, OrthoInspector, Panther, Phylome, RoundUp, TreeFam
unc-5	36703	FBgn0034013	unc-5	Human	8633	12569	UNC5C	15	14.75	high	Yes	Yes	Compara, eggNOG, Hieranoid, Homologene, Inparanoid, Isobase, OMA, OrthoDB, OrthoFinder, OrthoInspector, orthoMCL, Panther, Phylome, RoundUp, TreeFam
unc-5	36703	FBgn0034013	unc-5	Human	219699	12568	UNC5B	13	12.8	moderate	No	Yes	Compara, eggNOG, Hieranoid, Inparanoid, OMA, OrthoDB, OrthoFinder, OrthoInspector, orthoMCL, Panther, Phylome, RoundUp, TreeFam
unc-5	36703	FBgn0034013	unc-5	Human	90249	12567	UNC5A	13	12.8	moderate	No	Yes	Compara, eggNOG, Hieranoid, Inparanoid, OMA, OrthoDB, OrthoFinder, OrthoInspector, orthoMCL, Panther, Phylome, RoundUp, TreeFam
unc-5	36703	FBgn0034013	unc-5	Human	137970	18634	UNC5D	12	11.77	moderate	No	Yes	Compara, eggNOG, Hieranoid, Inparanoid, OMA, OrthoDB, OrthoFinder, OrthoInspector, orthoMCL, Panther, Phylome, TreeFam
unc-5	36703	FBgn0034013	unc-5	Human	222643	21203	UNC5CL	4	3.84	moderate	No	Yes	Compara, eggNOG, Panther, Phylome
