# Supplementary material for: Straightjacket/α2δ3 deregulation is associated with cardiac conduction defects in myotonic dystrophy type 1
Source: eLife. 2019 Dec 12;8:e51114. doi: 10.7554/eLife.51114 (PMC6908436; doi:10.7554/eLife.51114)
Supplement: Figure 5—source data 1. [file elife-51114-fig5-data1.xlsx]

## Sheet: Feuil1
	Stj signal level
wt
background
	area	mean	Int den	CTCF
1	1378	0.343	472
2	1088	0.285	310
3	1493	0.460	687
4	691	0.560	387
5	2308	0.502	1159
6	3838	0.627	2408						CTCF							Mean CTCF
							Wt		45273	28672	61447	92884	102174	65987		66072
Mean background		0.462					Hand>Bru-3		153442	40477	127691	155326	136829	170371		130689
							Hand>mblRNAi		114689	118378	134385	113955	163560	228813		145630
							Hand>Stj		204588	226602	276995	196156	234019	368351		251118
							Hand>stjRNAi		37224	26854	40657	25891	27848	28761		31205
wt
circ muscle	area	mean	Int den	CTCF
7	3110	14.983	46598	45273
8	1838	16.026	29455	28672
9	3312	18.979	62858	61447
10	5498	17.320	95227	92884
11	5735	18.242	104618	102174
12	3897	17.359	67648	65987
			Mean CTCF	66072
Hand>Bru-3
backgr	area	mean	Int den	CTCF
1	1442	4.861	7009
2	5009	5.133	25711
3	4797	5.394	25876
4	4430	5.100	22595
5	4939	5.819	28738
6	3520	5.943	20920
Mean background		5.375
circ muscle	area	mean	Int den	CTCF
7	5375	33.922	182333	153442
8	2492	21.624	53888	40477
9	4326	34.892	150944	127691
10	6032	31.125	187748	155326
11	6137	27.671	169816	136829
12	6035	33.606	202810	170371
			Mean CTCF	130689
Hand>MblRNAi
backgr	area	mean	Int den	CTCF
1	1134	5.187	5882
2	1117	4.569	5104
3	977	4.523	4419
4	1620	5.094	8252
5	2200	5.038	11083
6	1652	5.029	8308
	Mean	4.9
circ muscle	area	mean	Int den	CTCF
7	3966	33.818	134123	114689
8	5901	24.961	147293	118378
9	6352	26.056	165510	134385
10	4098	32.708	134036	113955
11	8613	23.890	205764	163560
12	11588	24.646	285595	228813
			Mean CTCF	145630
Hand>stj
backgr	area	mean	Int den	CTCF
1	2527	3.461	8747
2	3494	4.450	15550
3	3175	4.784	15188
4	2325	4.148	9645
5	2432	3.458	8411
6	6948	3.699	25700
	Mean	4.0
circ muscle	area	mean	Int den	CTCF
7	6193	37.035	229360	204588
8	7210	35.429	255442	226602
9	8594	36.231	311371	276995
10	5344	40.706	217532	196156
11	6698	38.939	260811	234019
12	8796	45.877	403535	368351
			Mean CTCF	251118
Hand>stjRNAi
backgr	area	mean	Int den	CTCF
1	2006	2.373	4760
2	2272	1.564	3553
3	1242	3.813	4736
4	1309	4.456	5833
5	2396	2.189	5244
6	1128	4.342	4898
	Mean	3.12
circ muscle	area	mean	Int den	CTCF
7	2664	15.926	42426	37224
8	2737	12.932	35394	26854
9	3943	13.431	52960	40657
10	2927	11.966	35024	25891
11	2704	13.419	36285	27848
12	2844	13.233	37635	28761
			Mean CTCF	31205
